# Supplementary material for: Pitfalls of using the risk ratio in meta‐analysis
Source: PubMed Central journal article supplement (PMC6767076; doi:10.1002/jrsm.1347), 2019-04-11
Supplement: JRSM-10-398-s001.pdf [file JRSM-10-398-s001.pdf]

# Supplementary material

## Appendix A

### A.1 Estimation of $\rho$ in the BB model

In this section, we give detailed derivations of the four estimators of  $\rho$  introduced in Section 4.5.

#### Method-of-moments estimator

Denote by  $\sigma_j^2(\rho) = \text{Var}(\hat{\theta}_j)$  the variance of  $\log(\text{RR})$  given in Equation (20). Then  $\sigma_j^2(\rho) = \sigma_j^2(0) + a_j\rho$ , where  $\sigma_j^2(0)$  is the variance under the fixed-effect model and  $a_j = (\pi_T^{-1} - 1)(1 - n_{jT}^{-1}) + (\pi_C^{-1} - 1)(1 - n_{jC}^{-1})$ . The inverse-variance weights are  $w_j(\rho) = \sigma_j^{-2}(\rho)$ . Cochran's statistic is  $Q = \sum \hat{w}_j(\hat{\theta}_j - \bar{\theta}_w)^2$ , where  $\hat{w}_j = \hat{\sigma}_j^{-2}(0)$  and  $\bar{\theta}_w = \sum \hat{w}_j \hat{\theta}_j / \sum \hat{w}_j$ . Under the null hypothesis of no over- or under-dispersion ( $\rho = 0$ ), the  $Q$ -statistic has approximately a chi-squared distribution with  $K - 1$  degrees of freedom, so  $E(Q) = K - 1$ . Using the theoretical weights  $w_j = w_j(0)$  instead of  $\hat{w}_j$ , the derivation of the expected value of  $Q$  yields

$$E(Q) = \sum w_j \sigma_j^2(\rho) - \frac{\sum w_j^2 \sigma_j^2(\rho)}{\sum w_j}.$$

After substitution of  $\sigma_j^2(\rho) = \sigma_j^2(0) + a_j\rho$ , this becomes

$$E(Q) = K - 1 + \left[ \sum w_j a_j - \frac{\sum w_j^2 a_j}{\sum w_j} \right] \rho.$$

The DerSimonian-Laird-inspired estimator of  $\rho$ , denoted by  $\hat{\rho}_{MoM}$ , is obtained by substituting  $Q$  for  $E(Q)$  and the estimated weights  $\hat{w}_j$  for the theoretical weights  $w_j$  and solving the resulting equation for  $\rho$ .

#### Modified Mandel-Paule estimator

Similarly, the modified Mandel-Paule estimator,  $\hat{\rho}_{MP}$ , is obtained by considering  $Q(\rho) = \sum \hat{w}_j(\rho)(\hat{\theta}_j - \bar{\theta}_{w(\rho)})^2$  and solving the equation  $Q(\rho) = K - 1$ . The weighted mean is  $\bar{\theta}_{w(\rho)} = \sum \hat{w}_j(\rho)\hat{\theta}_j / W(\rho)$ , where  $W(\rho) = \sum \hat{w}_j(\rho)$ .

#### Restricted-maximum-likelihood estimator

Following Kulinskaya and Olkin<sup>1</sup>, the REML equation for  $\rho$  is

$$(W(\rho))^{-1} \sum \hat{w}_j(\rho) \frac{a_j}{1 + a_j\rho} + \sum \hat{w}_j(\rho)(\theta_j - \theta)^2 \frac{a_j}{1 + a_j\rho} = \sum \frac{a_j}{1 + a_j\rho}, \quad (\text{A1})$$

and an iterative procedure readily yields a solution, denoted by  $\hat{\rho}_{REML}$ .

## Inverting the modified Breslow-Day test

The Breslow-Day test for homogeneity of odds ratios is based on the statistic

$$\sum_{j=1}^K \frac{(Y_{jT} - Y_{jT}(\hat{\psi}))^2}{\text{Var}(Y_{jT}|\hat{\psi})},$$

where  $Y_{jT}(\hat{\psi})$  and  $\text{Var}(Y_{jT}|\hat{\psi})$ , respectively, denote the expected value and the asymptotic variance of the number of events in the treatment group of Study  $j$  based on the Mantel-Haenszel<sup>2</sup> (MH) estimate of the odds ratio,  $\hat{\psi}$ . We apply the same approach to the risk ratio.

The expected number of events, given RR  $\hat{\psi}$  and the total number of events  $Y_j$ , is

$$Y_{jT}(\hat{\psi}) = \frac{\hat{\psi}n_{jT}Y_j}{n_j - n_{jT} + \hat{\psi}n_{jT}}.$$

The MH estimate for the relative risk is

$$\hat{\psi} = \frac{\sum y_{jT}n_{jC}/n_j}{\sum y_{jC}n_{jT}/n_j},$$

and the asymptotic variance<sup>3</sup> of  $Y_{jT}$  is

$$\text{Var}(Y_{jT}|\hat{\psi}) = \left[ \frac{1}{Y_{jT}(\hat{\psi})C_{jT}} + \frac{1}{(Y_j - Y_{jT}(\hat{\psi}))C_{jC}} + \frac{1}{(n_{jT} - Y_{jT}(\hat{\psi}))C_{jT}} + \frac{1}{(n_j - Y_j - n_{jT} + Y_{jT}(\hat{\psi}))C_{jC}} \right]^{-1}, \quad (\text{A2})$$

where  $C_{ji} = 1 + (n_{ji} - 1)\hat{\rho}$  are correction factors;  $i = C, T$ ;  $j = 1, \dots, K$ . The Breslow-Day statistic has a  $\chi_{K-1}^2$  distribution, and this modification of it can be used for testing the homogeneity of RRs. Equating the BD statistic to  $K - 1$  yields the Mandel-Paule-type estimate for  $\rho$ , denoted by  $\hat{\rho}_{BD}$ .

## A.2 Function for meta-analysis of relative risk using bbmle

```
#####grp-level outcome data#####
###          | Event | No event |
### Treatment | ai    | bi        |
### Control   | ci    | di        |
### K is the number of studies
### ai and ci are number of events in T and C arms
###required packages : bbmle and emdbook
###initial parameters
my_bbmle<-function(ai , bi , ci , di) {
  require(emdbook)
  require(bbmle)
  ##initial parameters
  pT0<-sum(( ai+0.5)/(ni+1))/k
  pC0<-sum(( ci+0.5)/(ni+1))/k
  rho0<-0.01
  #####
  ### negative log-likelihood functions for
  ### a pair of beta-binomial distribution
  mtmp <- function(probT , sizeT , theta , probC , sizeC) {
    -sum(dbetabinom( ai , probT , sizeT , theta , log=TRUE))
    -sum(dbetabinom( ci , probC , sizeC , theta , log=TRUE))
  }
  m0 <- suppressWarnings( try( mle2(mtmp, start=list( probT=pT0,
    theta=rho0^(-1)-1, probC=pC0) , data=list( sizeT=ni , sizeC=ni) ) ,
    silent=TRUE))
  if(!(!(inherits(m0, "try-error")))){
    if(!(!(is.na(stdEr(m0) [[1]]))&(!(is.na(stdEr(m0) [[3]]))))) {
      probT1<-coef(m0) [[1]]
      probC1<-coef(m0) [[3]]
      varT1<-(stdEr(m0) [[1]]) ^2
      varC1<-(stdEr(m0) [[3]]) ^2
      varlogRR<-(1/probT1)^2*varT1+(1/probC1)^2*varC1
      RR1<-(probT1)/(probC1)
      log_RR<-log(RR1)
      logRRL<-log_RR-qnorm(.975)*sqrt(varlogRR)
      logRRU<-log_RR+qnorm(.975)*sqrt(varlogRR)
      rhoEst<-1/(coef(m0) [[2]]+1)
      return(list( rhoEst , log_RR, logRRL , logRRU))
    }
  }
}
```

### A.3 Function for meta-analysis of relative risk using gamlss

```

##R version 3.5.0
#####grp-level outcome data#####
###          | Event | No event |
### Treatment | ai    | bi      |
### Control   | ci    | di      |
### K is the number of studies
### ai and ci are number of events in T and C arms
###required packages: gamlss
my_gamlss<-function( ai , bi , ci , di ) {
  require(emdbook)
  require(gamlss)
  r<-c( ai , ci )
  N<-c( ni , ni )
  y<-cbind( r , N-r )
  arm<-c( rep( "T" , times=k ) , rep( "C" , times=k ) )
  arm<-as. factor( arm )
  sink( tempfile () )
  modelGamlss <- suppressWarnings( try( gamlss( y~arm-1 , sigma .
    formula=~1 , family=BB ) , silent=TRUE ) )
  sink ()
  if ( ! ( inherits ( modelGamlss , "try-error" ) ) ) {
    #####fitting the model using gamlss#####
    sink ( tempfile () )
    res<-suppressWarnings( summary( modelGamlss , save=TRUE ) )
    sink ()
    pC3<-exp( modelGamlss$mu. coefficients [[ 1 ] ] ) / ( 1 + exp (
      modelGamlss$mu. coefficients [[ 1 ] ] ) )
    pT3<-exp( modelGamlss$mu. coefficients [[ 2 ] ] ) / ( 1 + exp (
      modelGamlss$mu. coefficients [[ 2 ] ] ) )
    st. error1<-( res$coef. table [ , 2 ] [[ 1 ] ] )
    st. error2<-( res$coef. table [ , 2 ] [[ 2 ] ] )
    varC3<-( 1 / ( 1 + exp ( modelGamlss$mu. coefficients [[ 1 ] ] ) ) ^ 2 ) ^ 2 * ( st
      . error1 ) ^ 2
    varT3<-( 1 / ( 1 + exp ( modelGamlss$mu. coefficients [[ 2 ] ] ) ) ^ 2 ) ^ 2 * ( st
      . error2 ) ^ 2
    RR3<-pT3/pC3
    logRRgamlss<-log( RR3 )
    varRR3<-varT3+varC3
    logRRL_gamlss=0
    logRRU_gamlss=0
  }
}

```

```

if(!is.null(st.error2)){
logRRL_gamlss<-logRRgamlss-qnorm(.975)*sqrt(varRR3)
logRRU_gamlss<-logRRgamlss+qnorm(.975)*sqrt(varRR3)
}
rhoEst<-exp(modelGamlss$sigma.coefficients[[1]])/(1+exp(
  modelGamlss$sigma.coefficients[[1]]) )
}
return(list(rhoEst ,logRRgamlss ,logRRL_gamlss ,logRRU_gamlss))
}

```

## A.4 Function for meta-analysis of relative risk using $\rho_{DL}$

```
##R version 3.5.0
#####grp-level outcome data#####
###          | Event | No event |
### Treatment | ai    | bi      |
### Control   | ci    | di      |
### K is the number of studies
### ai and ci are number of events in T and C arms
###required packages: None
my_DL_function_generic<-function(ai , ci , bi , di) {
pli<-(ai+0.5)/(ai+bi+1)
p2i<-(ci+0.5)/(ci+di+1)
psi_i<-(ai+0.5)*((ci+di)+0.5)/((ci+0.5)*(ai+bi+0.5))
yi    <- log(psi_i)
vi    <- 1/(ai+0.5)-1/(ai+bi+0.5)+1/(ci+0.5)-1/(ci+di+0.5)
n1i<-ai+bi
n2i<-ci+di
n_i<-n1i+n2i
Ri<-n1i/n2i
a_i<-((Ri*n_i/(Ri+1))*((1+psi_i-2*pli)/(Ri*(1-pli)+psi_i-pli)
)-1
wi<-1/vi
W<-sum(wi)
thetabar<-sum(yi*wi)/W
Q<-sum(wi*(yi-thetabar)^2)
barn_w<-sum(a_i*wi)/W
barn<-sum(a_i)/k
rho_M<-max((Q-k+1)/(k*barn-barn_w),-1/max(ni-1))
###estimated weights
w_M<-wi/(1+a_i*rho_M)
thetabar_M<-sum(yi*w_M)/sum(w_M)
Ltheta_M<-thetabar_M+qnorm(.975)/sqrt(sum(w_M))
Utheta_M<-thetabar_M+qnorm(.975)/sqrt(sum(w_M))
return(list(rho_M, thetabar_M, Ltheta_M, Utheta_M))
}
```

## A.5 Function for meta-analysis of relative risk using

$\rho_{MP}$

```
##R version 3.5.0
#####grp-level outcome data#####
###      | Event | No event |
### Treatment | ai      | bi      |
### Control   | ci      | di      |
### K is the number of studies
### ai and ci are number of events in T and C arms
my_MP_function_generic<-function(ai, ci, bi, di){
k<-length(ai)
fMP<-function(g, sigma2, theta, a_i, k){
sum((theta-sum(theta/(sigma2*(1+a_i*g)))
/sum(1/(sigma2*(1+a_i*g))))^2/(sigma2*(1+a_i*g))-(k-1)}
pli<-(ai+0.5)/(ai+bi+1)
p2i<-(ci+0.5)/(ci+di+1)
psi_i<-(ai+0.5)*((ci+di)+0.5)/((ci+0.5)*(ai+bi+0.5))
yi      <- log(psi_i)
vi      <- 1/(ai+0.5) - 1/(ai+bi+0.5) + 1/(ci+0.5) - 1/(ci+di
+0.5)
wi<-1/vi
n1i<-ai+bi
n2i<-ci+di
n_i<-n1i+n2i
Ri<-n1i/n2i
a_i<-(Ri*n_i/(Ri+1))*((1+psi_i-2*pli)/(Ri*(1-pli)+psi_i-pli)
)-1
ll<-max(-1/max(a_i), -1/max(n1i-1), -1/max(n2i-1))+0.00000001
uu<-1000
if (fMP(ll, sigma2=vi, theta=yi, a_i=a_i, k=k)*
fMP(uu, sigma2=vi, theta=yi, a_i=a_i, k=k)<0)
{
rho_MP<-as.numeric(uniroot(fMP, c(ll, uu), tol = 0.0001,
sigma2=vi, theta=yi, a_i=a_i, k=k)[1])
w_MP<-wi/(1+a_i*rho_MP)
thetabar_MP<-sum(yi*w_MP)/sum(w_MP)
if (rho_MP==(-1/max(ni-1)) | is.na(thetabar_MP) | (rho_MP==(-1/
max(ni-1))&is.na(thetabar_MP))) {
yi_maxni<-yi[ni==max(ni)]
wi_maxni<-wi[ni==max(ni)]
thetabar_MP<-sum(yi_maxni*wi_maxni)/sum(wi_maxni)
w_MP<-wi[ni==max(ni)]
```

```
}  
Ltheta_MP<-thetabar_MP-qnorm(.975)/sqrt(sum(w_MP))  
Utheta_MP<-thetabar_MP+qnorm(.975)/sqrt(sum(w_MP))  
return(list(rho_MP,thetabar_MP,Ltheta_MP,Utheta_MP))  
}
```



## A.6 Function for meta-analysis of relative risk using $\rho_{BD}$

```
##R version 3.5.0
#####grp-level outcome data#####
###          | Event | No event |
### Treatment | ai    | bi      |
### Control   | ci    | di      |
### K is the number of studies
### ai and ci are number of events in T and C arms
###required packages: None
my_BD_function_generic<-function(ai , ci , bi , di) {
nT<-ni
nC<-ni
XT<-ai
XC<-ci
k<-length(ai)
p1i<-(ai+0.5)/(ai+bi+1)
p2i<-(ci+0.5)/(ci+di+1)
psi_i<-(ai+0.5)*((ci+di)+0.5)/((ci+0.5)*(ai+bi+0.5))
yi<-log(psi_i)
vi<-1/(ai+0.5)-1/(ai+bi+0.5)+1/(ci+0.5)-1/(ci+di+0.5)
wi<-1/vi
n1i<-ai+bi
n2i<-ci+di
n_i<-n1i+n2i
Ri<-n1i/n2i
a_i<-(Ri*n_i/(Ri+1))*((1+psi_i-2*p1i)/(Ri*(1-p1i)+psi_i-p1i)
)-1
#####
#####Breslow-day method#####
rho_BD<-numeric(1)
###Breslow-Day test conf. inter.
rho_BDU<-numeric(1)
rho_BDL<-numeric(1)
ll<-max(-1/max(a_i),-1/max(n1i-1),-1/max(n2i-1))+0.00000001
uu<-1000
##Mantel-Haenzsel estimator of relative risk
psiMH<-sum((nC*XT)/(nC+nT))/sum((nT*XC)/(nC+nT))
if (psiMH==1) {X1j=((ai+ci)*n1i)/(n1i+n2i)} else {
X1j<-psiMH*n1i*(ai+ci)/((n1i+n2i)-n1i+psiMH*n1i)
}
#function for the Standard Breslow day test
f<-function(rho,X_1j,X1j,xj,n1j,n2j,nj,k){
varj<-((1/(X1j*(1+(n1j-1)*rho))+1/((xj-X1j)*(1+(n2j-1)*rho)))
```

```

+1/((n1j-X1j)*(1+(n1j-1)*rho))+1/((nj-xj-n1j+X1j)*(1+(n2j-1)*rho)))^-1)
varj0<-((1/((X1j+.5)*(1+(n1j-1)*rho))+1/((xj-X1j+.5)*(1+(n2j-1)*rho))+1/((n1j-X1j+.5)*(1+(n1j-1)*rho))+1/((nj-xj-n1j+X1j+.5)*(1+(n2j-1)*rho))))^-1)
var<-ifelse(is.na(varj),varj0,varj)
var<-ifelse(var==0,varj0,var)
sum((X_1j-X1j)^2/var)-k+1
}

if(f(uu,ai,X1j,ai+ci,n1i,n2i,n1i+n2i,k=k)>0){rho_BD<-1}
if((f(ll,ai,X1j,ai+ci,n1i,n2i,n1i+n2i,k=k)>0)&(f(uu,ai,X1j,ai+ci,n1i,n2i,n1i+n2i,k=k)<0)){
rho_BD<-as.numeric(uniroot(f,c(ll,uu),tol=0.00001,X_1j=ai,X1j=X1j,xj=ai+ci,n1j=n1i,n2j=n2i,nj=(n1i+n2i),k=k)[1])
}
###Upper Limit
f1<-function(rho,X_1j,X1j,xj,n1j,n2j,nj,k){
varj<-((1/(X1j*(1+(n1j-1)*rho))+1/((xj-X1j)*(1+(n2j-1)*rho))+1/((n1j-X1j)*(1+(n1j-1)*rho))+1/((nj-xj-n1j+X1j)*(1+(n2j-1)*rho))))^-1)
varj0<-((1/((X1j+.5)*(1+(n1j-1)*rho))+1/((xj-X1j+.5)*(1+(n2j-1)*rho))+1/((n1j-X1j+.5)*(1+(n1j-1)*rho))+1/((nj-xj-n1j+X1j+.5)*(1+(n2j-1)*rho))))^-1)
var<-ifelse(is.na(varj),varj0,varj)
var<-ifelse(var==0,varj0,var)
sum((X_1j-X1j)^2/var)-qchisq(0.025,k-1)
}

if(f1(uu,ai,X1j,ai+ci,n1i,n2i,n1i+n2i,k=k)>0){rho_BDU<-1}
if((f1(ll,ai,X1j,ai+ci,n1i,n2i,n1i+n2i,k=k)>0)&(f1(uu,ai,X1j,ai+ci,n1i,n2i,n1i+n2i,k=k)<0)){
rho_BDU<-as.numeric(uniroot(f1,c(ll,uu),tol=0.00001,X_1j=ai,X1j=X1j,xj=ai+ci,n1j=n1i,n2j=n2i,nj=(n1i+n2i),k=k)[1])
}
###Lower Limit
f2<-function(rho,X_1j,X1j,xj,n1j,n2j,nj,k){
varj<-((1/(X1j*(1+(n1j-1)*rho))+1/((xj-X1j)*(1+(n2j-1)*rho))+1/((n1j-X1j)*(1+(n1j-1)*rho))+1/((nj-xj-n1j+X1j)*(1+(n2j-1)*rho))))^-1)
varj0<-((1/((X1j+.5)*(1+(n1j-1)*rho))+1/((xj-X1j+.5)*(1+(n2j-1)*rho))+1/((n1j-X1j+.5)*(1+(n1j-1)*rho))+1/((nj-xj-n1j+X1j+.5)*(1+(n2j-1)*rho))))^-1)
var<-ifelse(is.na(varj),varj0,varj)

```

```

var<-ifelse(var==0, varj0, var)
sum((X_1j-X1j)^2/var)-qchisq(0.975, k-1)
}

if(f2(uu, ai, X1j, ai+ci, n1i, n2i, n1i+n2i, k=k)>0){rho_BDL<-11}
if((f2(ll, ai, X1j, ai+ci, n1i, n2i, n1i+n2i, k=k)>0)&(f2(uu, ai, X1j,
, ai+ci, n1i, n2i, n1i+n2i, k=k)<0)){
rho_BDL<-as.numeric(uniroot(f2, c(ll, uu), tol=0.00001, X_1j=ai,
X1j=X1j, xj=ai+ci, n1j=n1i, n2j=n2i, nj=(n1i+n2i), k=k)[1])
}
#####Inverse variance estimation of theta using rho_BD
#####
w_BD<-wi/(1+a_i*rho_BD)
thetabar_BD<-sum(yi*w_BD)/sum(w_BD)
Ltheta_BD<-thetabar_BD-qnorm(.975)/sqrt(sum(w_BD))
Utheta_BD<-thetabar_BD+qnorm(.975)/sqrt(sum(w_BD))
return(list(rho_BD, rho_BDL, rho_BDU, thetabar_BD, Ltheta_BD,
Utheta_BD))
}

```

## Appendix B

### B.1 Estimation of the between-studies variance when $\tau^2 = 0.1$ and the data are generated under the point-mass option and the truncation option

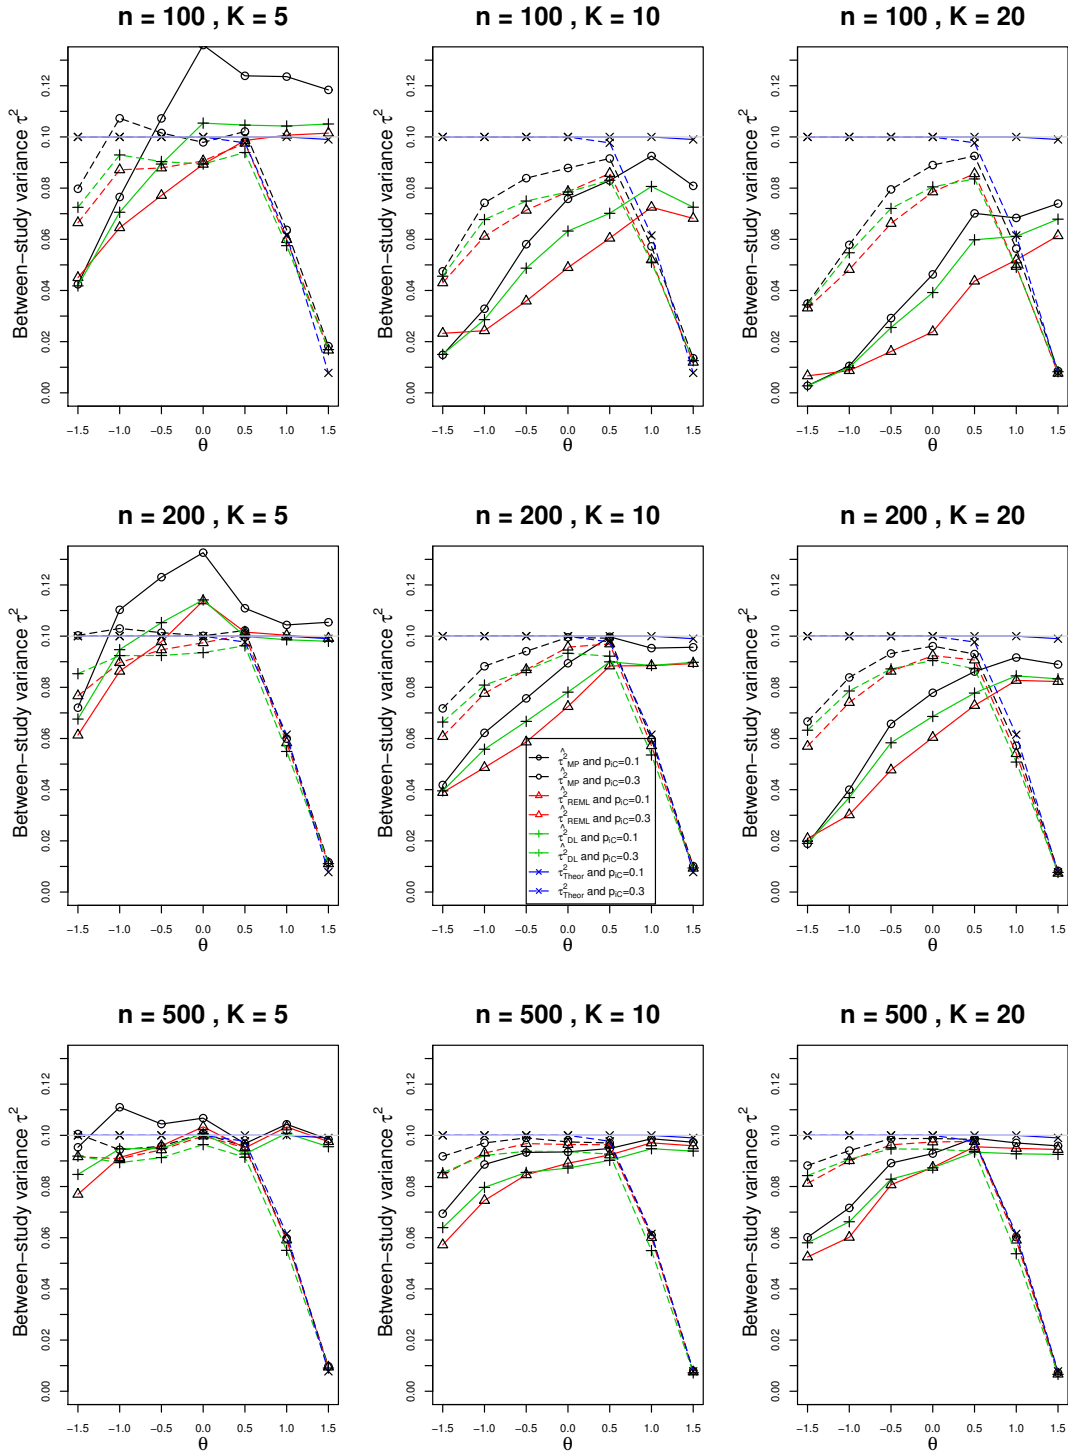

Figure B.1: Relation of estimates of the between-studies variance  $\tau^2$  to the overall log-risk-ratio ( $\theta$ ) in  $K$  studies, each of total sample size  $n$ , when data come from the binomial-normal model with point mass for  $\tau^2 = 0.1$  and  $\pi_{jC} = 0.1$  (solid lines) and 0.3 (dashed). The Mandel-Paule (circle), REML (triangle), and DerSimonian-Laird (plus) estimation methods are compared with the true variance (cross). Light grey line at 0.1.

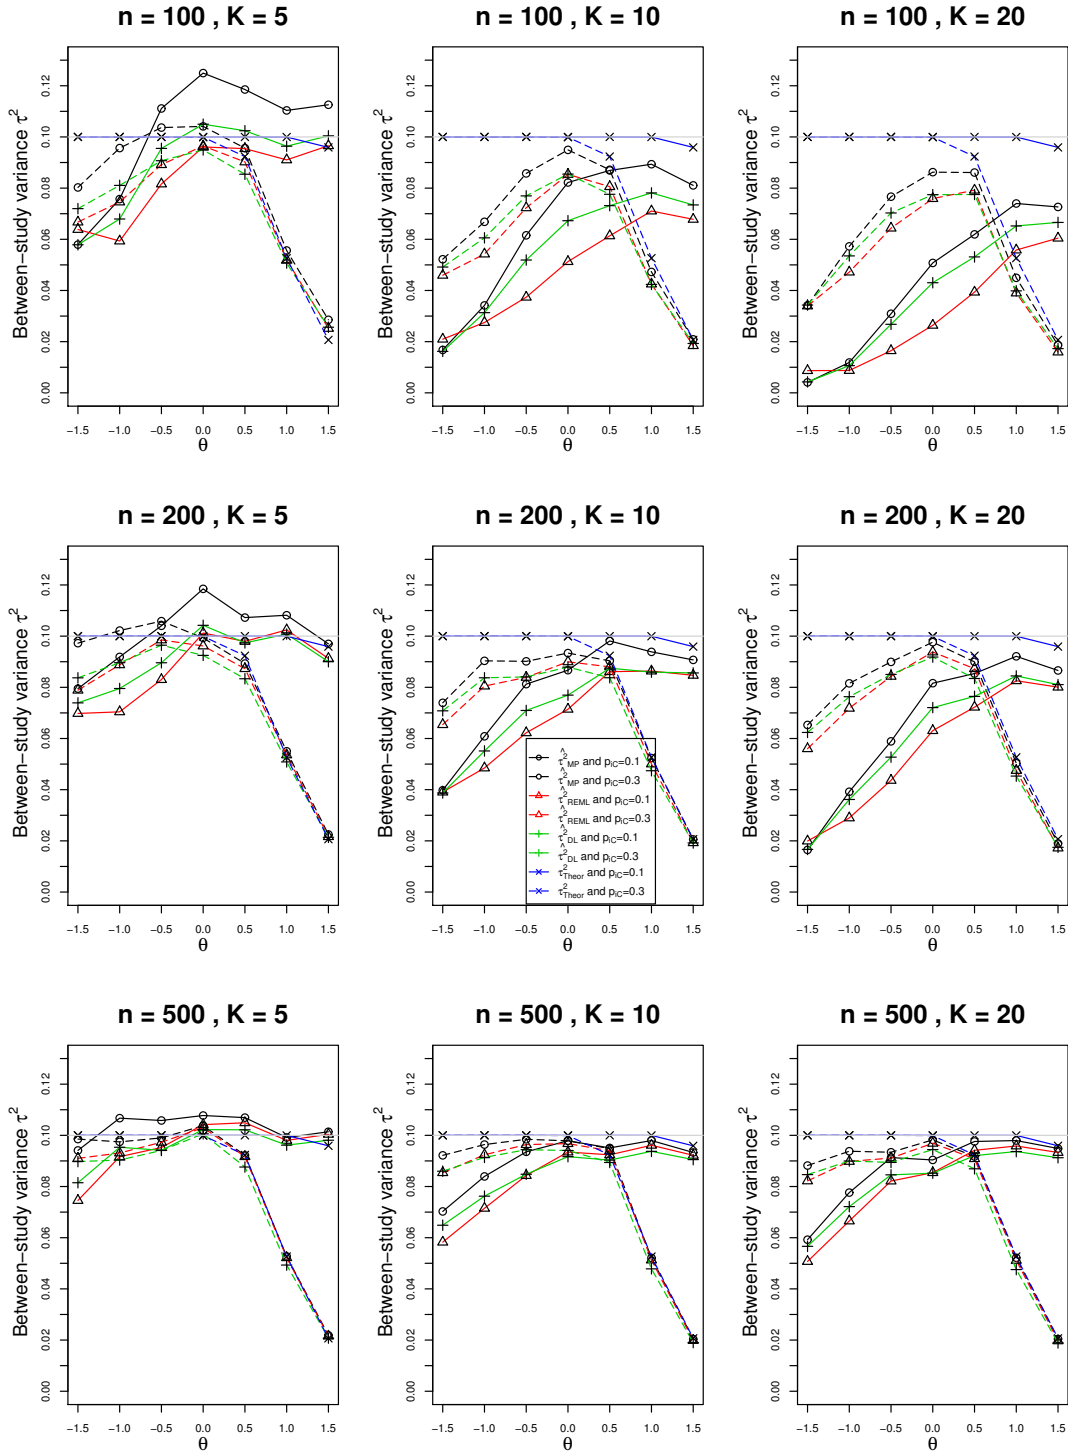

Figure B.2: Relation of estimates of the between-studies variance  $\tau^2$  to the overall log-risk-ratio ( $\theta$ ) in  $K$  studies, each of total sample size  $n$ , when data come from the binomial-normal model with truncation for  $\tau^2 = 0.1$  and  $\pi_{JC} = 0.1$  (solid lines) and 0.3 (dashed). The Mandel-Paule (circle), REML (triangle), and DerSimonian-Laird (plus) estimation methods are compared with the true variance (cross). Light grey line at 0.1.

## B.2 Figures for studentized residuals when $K \geq 10$

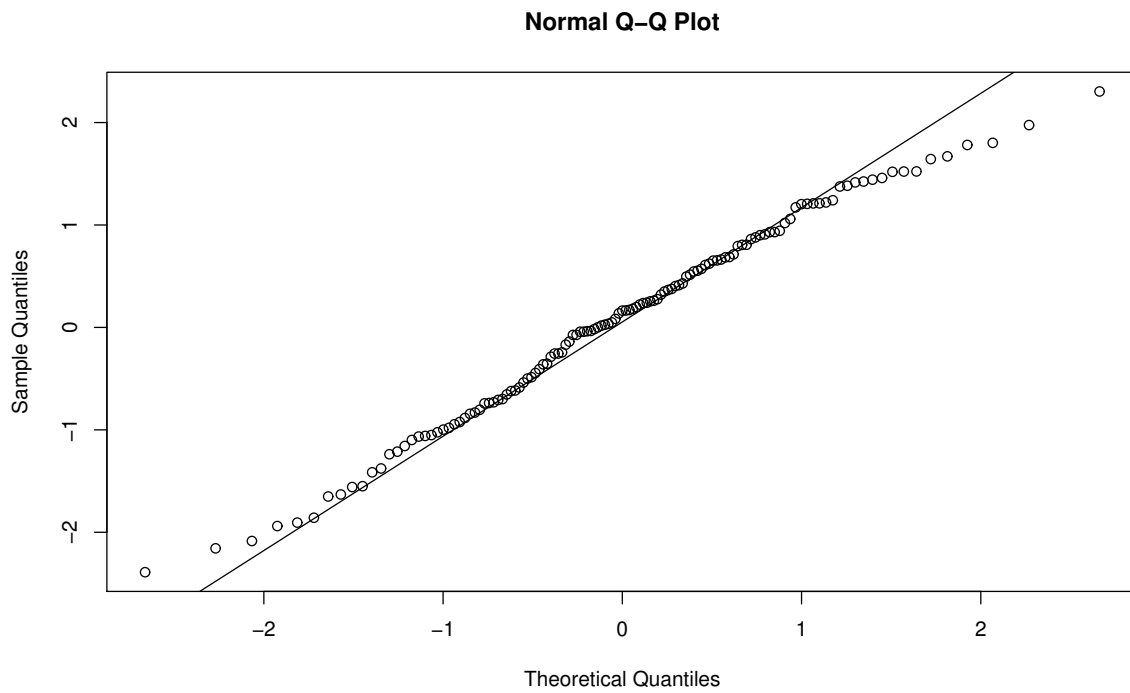

Figure B.3: Normal Q-Q plot of the 129 studentized residuals for the studies from 11 REM meta-analyses of RR with  $\hat{\theta} \geq 0$ ,  $\hat{\tau}^2 > 0$  and  $K \geq 10$  in Cochrane Library Issue 4.



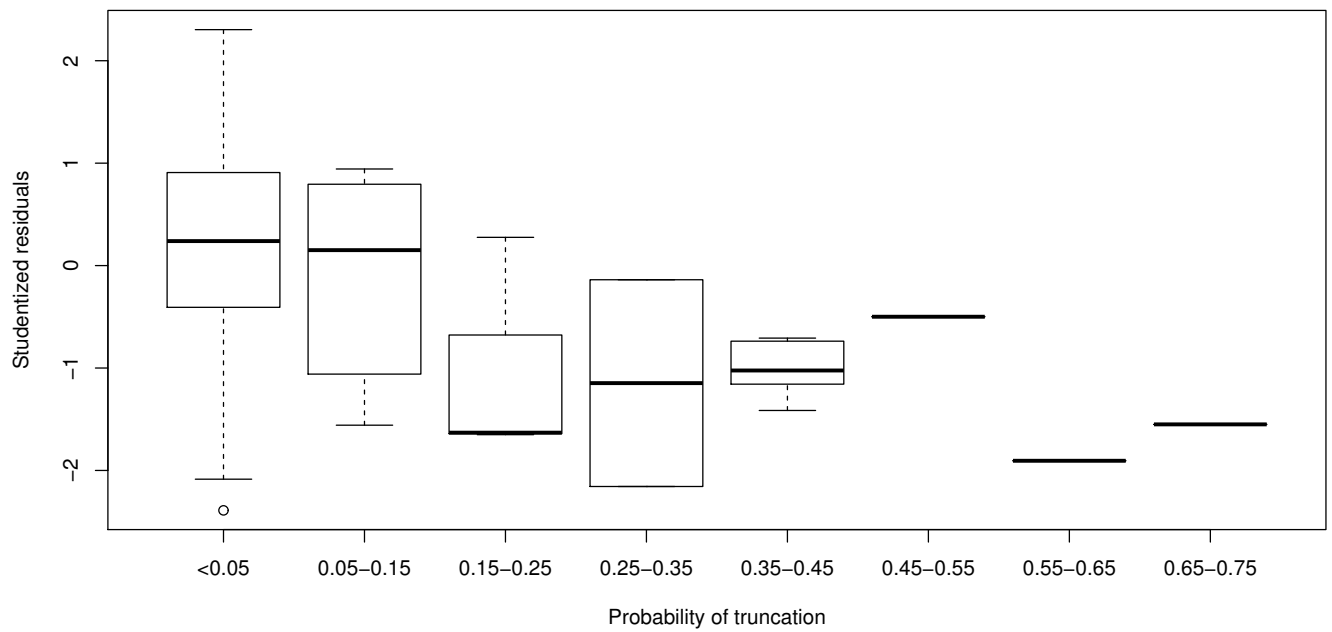

Figure B.4: Boxplots of 129 studentized residuals by truncation probability, for the studies from 11 REM meta-analyses of RR with  $\hat{\theta} \geq 0$ ,  $\hat{\tau}^2 > 0$  and  $K \geq 10$  in Cochrane Library Issue 4.

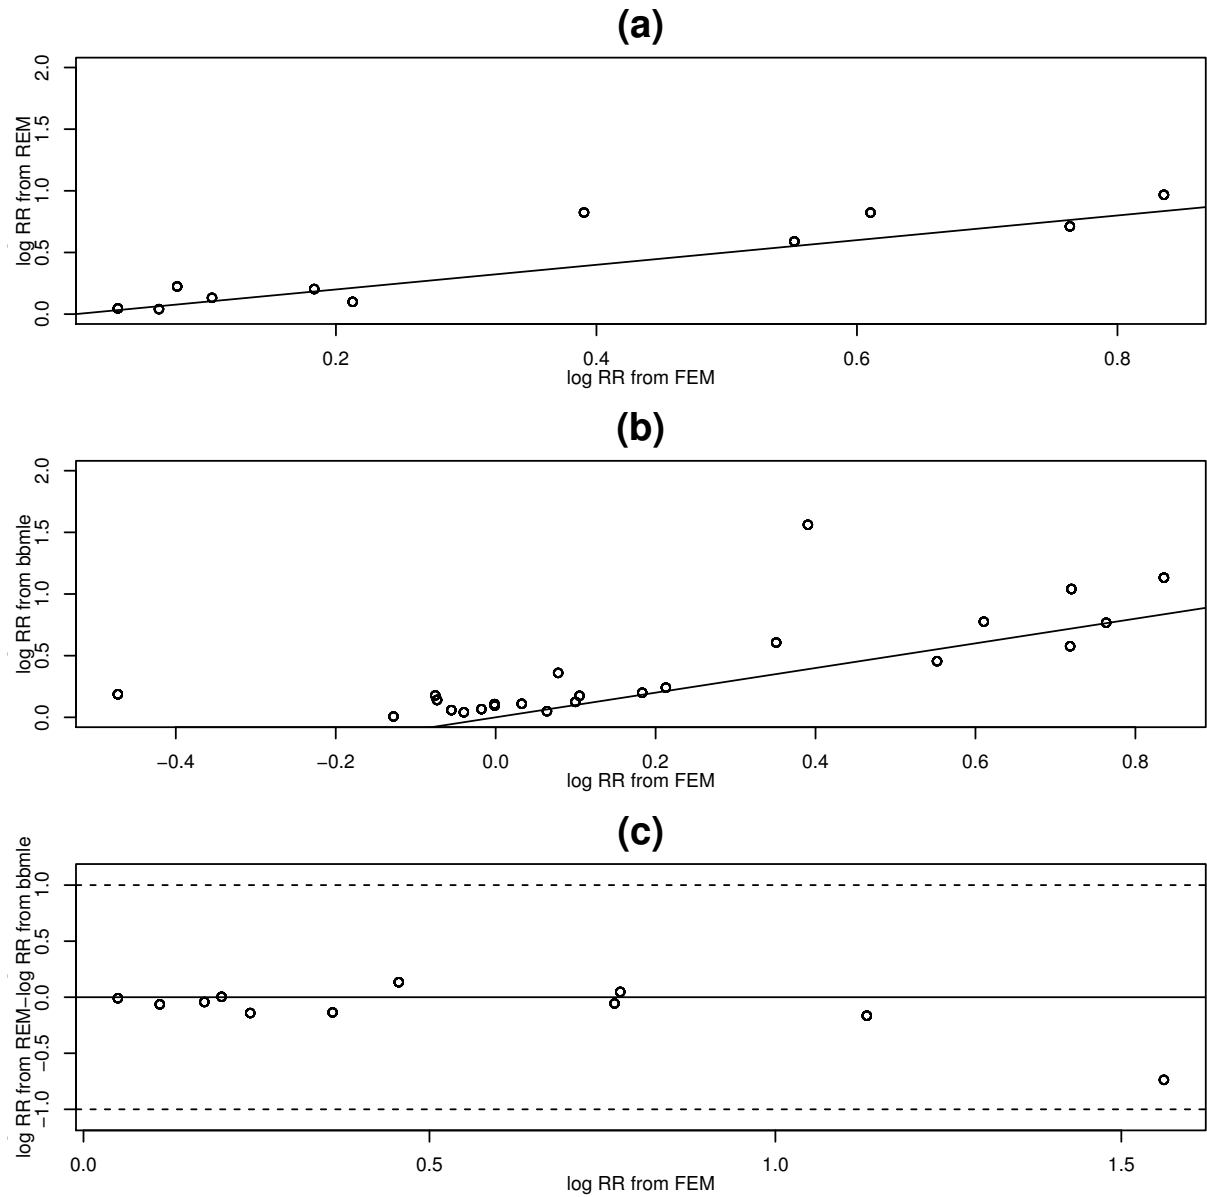

Figure B.5: Scatterplot (vs. log-risk-ratio from FEM) of the meta-analytic estimates of log-risk-ratio obtained by:(a) REM, for the 11 REM meta-analyses of RR with  $K \geq 10$ ,  $\hat{\theta}_{REM} \geq 0$  and  $\hat{\tau}^2 > 0$ ; (b) *bbmle*, for the 24 meta-analyses of RR with  $K \geq 10$ ,  $\hat{\theta}_{bbmle} \geq 0$  and  $\hat{\rho} > 0$ ; (c) Difference between log(RR) from REM and *bbmle* for the 11 meta-analyses with  $K \geq 10$ ,  $\hat{\rho} > 0$  and  $\hat{\theta}_{bbmle} \geq 0$  and  $\tau^2 > 0$  and  $\hat{\theta}_{REM} \geq 0$ .

## References

- [1] E. Kulinskaya and I. Olkin, “An overdispersion model in meta-analysis,” *Statistical Modelling*, vol. 14, no. 1, pp. 49–76, 2014.
- [2] N. Mantel and W. Haenszel, “Statistical aspects of the analysis of data from retrospective studies of disease,” *Journal of the National Cancer Institute*, vol. 22, no. 4, pp. 719–748, 1959.
- [3] G. A. Darlington and A. Donner, “Meta-analysis of community-based cluster randomization trials with binary outcomes,” *Clinical Trials*, vol. 4, no. 5, pp. 491–498, 2007.
